# Supplementary material
Source: PubMed Central journal article supplement (PMC5834721)
Supplement: pnas.201720447SI.pdf [file pnas.201720447SI.pdf]

# Supporting Information

Yates et al. 10.1073/pnas.1720447115

**Table S1. Genes differentially expressed by Helios KO and WT Tregs**

| Gene                             | Log <sub>2</sub> -fold change | Adjusted <i>P</i> value | Gene                 | Log <sub>2</sub> -fold change | Adjusted <i>P</i> value |
|----------------------------------|-------------------------------|-------------------------|----------------------|-------------------------------|-------------------------|
| <b>Spleen (Helios KO vs. WT)</b> |                               |                         |                      |                               |                         |
| <i>Lgals7</i>                    | 2.658067543                   | 2.68447E-09             | <i>Cenpk</i>         | -1.58585413                   | 0.002388457             |
| <i>Scin</i>                      | 2.646040334                   | 4.95706E-10             | <i>Cxcr4</i>         | -1.606547252                  | 1.07696E-05             |
| <i>Ifitm3</i>                    | 2.57950702                    | 1.35082E-05             | <i>Cacna1s</i>       | -1.622634173                  | 0.000344232             |
| <i>Xcr1</i>                      | 2.56641222                    | 1.30049E-06             | <i>Susd2</i>         | -1.63454853                   | 2.37677E-14             |
| <i>Cdkn2b</i>                    | 2.369197852                   | 5.27007E-05             | <i>1810006J02Rik</i> | -1.645727504                  | 6.1686E-06              |
| <i>Epas1</i>                     | 2.148578533                   | 4.95706E-10             | <i>Ankrd6</i>        | -1.757201789                  | 0.000722667             |
| <i>Nmur1</i>                     | 2.112438075                   | 0.002740879             | <i>Ston1</i>         | -1.771411532                  | 0.003611358             |
| <i>Pydc3</i>                     | 2.081854816                   | 0.007220163             | <i>Fam164a</i>       | -1.827083637                  | 0.008741077             |
| <i>Fam69c</i>                    | 2.027060833                   | 0.002791488             | <i>Lima1</i>         | -1.8880349                    | 0.005211432             |
| <i>Igfbp7</i>                    | 2.022091538                   | 0.002389996             | <i>Optn</i>          | -2.016705042                  | 0.000118596             |
| <i>Ccl1</i>                      | 2.015471591                   | 0.008350112             | <i>Ctla2b</i>        | -2.040417953                  | 9.09252E-07             |
| <i>Cxcr6</i>                     | 1.924874372                   | 2.48162E-10             | <i>Itga7</i>         | -2.083249223                  | 9.37614E-06             |
| <i>G530011O06Rik</i>             | 1.924669607                   | 0.000344232             | <i>6720401G13Rik</i> | -2.143348671                  | 1.9745E-06              |
| <i>Sico4a1</i>                   | 1.891511954                   | 0.00338922              | <i>Ncam1</i>         | -2.243420584                  | 0.009098171             |
| <i>5830416I19Rik</i>             | 1.734463988                   | 0.003912622             | <i>Gatm</i>          | -2.318714341                  | 0.003450343             |
| <i>Havcr2</i>                    | 1.671731332                   | 0.003153528             | <i>Spns3</i>         | -2.341298729                  | 0.006970052             |
| <i>Rln3</i>                      | 1.658814917                   | 2.30231E-17             | <i>Gprc5a</i>        | -2.394962548                  | 0.001382246             |
| <i>Rell1</i>                     | 1.535072895                   | 1.21901E-05             | <i>Ccdc46</i>        | -2.511417308                  | 4.85426E-05             |
| <i>4930412O13Rik</i>             | 1.50060528                    | 0.002027753             | <i>F5</i>            | -2.551207716                  | 0.003611358             |
| <i>Gem</i>                       | -1.522927512                  | 0.004468241             | <i>B3galt5</i>       | -2.698244164                  | 7.75252E-06             |
| <i>Edaradd</i>                   | -1.529142153                  | 0.002820085             | <i>Trim10</i>        | -2.72454881                   | 0.00165481              |
| <i>Serinc3</i>                   | -1.549741145                  | 1.31232E-13             |                      |                               |                         |
| <b>Tumor (Helios KO vs. WT)</b>  |                               |                         |                      |                               |                         |
| <i>Il4</i>                       | 3.658177124                   | 1.45E-11                | <i>Vash1</i>         | 1.840240595                   | 0.001120079             |
| <i>Scin</i>                      | 3.435824949                   | 7.18E-19                | <i>Il1r2</i>         | 1.821296123                   | 9.68E-07                |
| <i>Pydc3</i>                     | 3.256324595                   | 1.77E-07                | <i>Ifitm2</i>        | 1.814620313                   | 1.30E-14                |
| <i>Lgals7</i>                    | 3.179605436                   | 1.34E-20                | <i>Nckap5</i>        | 1.809936707                   | 0.000152949             |
| <i>Il21</i>                      | 2.937181996                   | 3.76E-05                | <i>4930412O13Rik</i> | 1.768880177                   | 8.77E-06                |
| <i>Ermn</i>                      | 2.82523349                    | 5.41E-05                | <i>Xcr1</i>          | 1.767769129                   | 0.000504895             |
| <i>Tnfsf8</i>                    | 2.811147709                   | 1.94E-72                | <i>Mid1</i>          | 1.765606414                   | 3.70E-05                |
| <i>Tnc</i>                       | 2.767405532                   | 1.50E-07                | <i>Lgmn</i>          | 1.751292508                   | 1.27E-14                |
| <i>G530011O06Rik</i>             | 2.726413992                   | 3.65E-10                | <i>Cd40lg</i>        | 1.707430232                   | 1.71E-15                |
| <i>Tnfsf11</i>                   | 2.647264577                   | 4.54E-21                | <i>Sema7a</i>        | 1.640529976                   | 0.00931739              |
| <i>Csf2</i>                      | 2.626345581                   | 2.63E-06                | <i>Palld</i>         | 1.635001673                   | 0.000268784             |
| <i>5830416I19Rik</i>             | 2.580757562                   | 1.77E-07                | <i>Gm14446</i>       | 1.629863198                   | 2.94E-05                |
| <i>Gzmc</i>                      | 2.482794504                   | 6.55E-09                | <i>Cldn25</i>        | 1.611467866                   | 8.20E-47                |
| <i>1300014I06Rik</i>             | 2.4004248                     | 0.001851397             | <i>Il1rl1</i>        | 1.563280988                   | 1.21E-09                |
| <i>Ccr3</i>                      | 2.37421554                    | 4.08E-17                | <i>Arl4c</i>         | 1.560941305                   | 4.98E-26                |
| <i>Ramp3</i>                     | 2.364773339                   | 6.65E-21                | <i>Mmp25</i>         | 1.543150071                   | 0.008611886             |
| <i>Ipmk</i>                      | 2.353821768                   | 1.58E-19                | <i>Rps4y2</i>        | 1.537731201                   | 0.000381017             |
| <i>Ifitm1</i>                    | 2.301511362                   | 0.001838493             | <i>Lancl3</i>        | 1.533832523                   | 0.00817211              |
| <i>Fam69c</i>                    | 2.299333984                   | 8.08E-05                | <i>Bmyc</i>          | -1.506848564                  | 2.36E-27                |
| <i>Nmur1</i>                     | 2.228184638                   | 9.92E-05                | <i>Irak1bp1</i>      | -1.512953124                  | 0.003342283             |
| <i>Fam20a</i>                    | 2.210932465                   | 2.24E-09                | <i>Fam73a</i>        | -1.528608297                  | 0.000156832             |
| <i>6430562O15Rik</i>             | 2.130053409                   | 0.006970673             | <i>Ablim2</i>        | -1.540172337                  | 0.002187868             |
| <i>Gpr15</i>                     | 2.128342831                   | 1.49E-12                | <i>Pgcp</i>          | -1.541979997                  | 0.000140215             |
| <i>A930001A20Rik</i>             | 2.106485353                   | 0.004051292             | <i>Zfp365</i>        | -1.546820849                  | 0.001186914             |
| <i>Slc17a6</i>                   | 2.092939968                   | 0.005317657             | <i>Ehbp1</i>         | -1.562837802                  | 0.004152742             |
| <i>Mmp9</i>                      | 2.085351066                   | 6.38E-11                | <i>Dse</i>           | -1.571899587                  | 0.007814486             |
| <i>Ffar2</i>                     | 1.999312782                   | 0.007291635             | <i>L2hgdh</i>        | -1.572353601                  | 0.004019477             |
| <i>Pqlc1</i>                     | 1.997829885                   | 4.99E-05                | <i>Ctla2b</i>        | -1.578041354                  | 3.50E-08                |
| <i>Cebpa</i>                     | 1.988728501                   | 0.004802616             | <i>Gucy1a3</i>       | -1.588923283                  | 0.00579425              |
| <i>Cxcl10</i>                    | 1.97550785                    | 3.39E-06                | <i>Btbd16</i>        | -1.590587224                  | 0.006531401             |
| <i>Furin</i>                     | 1.945924012                   | 6.00E-19                | <i>Smyd2</i>         | -1.592413828                  | 6.38E-08                |
| <i>Ifi204</i>                    | 1.937065553                   | 0.000656685             | <i>Zfp3612</i>       | -1.596172541                  | 2.25E-20                |
| <i>Ccl1</i>                      | 1.928155309                   | 0.003948586             | <i>Camk1</i>         | -1.596457274                  | 0.005468302             |

Table S1. Cont.

| Gene                 | Log <sub>2</sub> -fold change | Adjusted P value | Gene                 | Log <sub>2</sub> -fold change | Adjusted P value |
|----------------------|-------------------------------|------------------|----------------------|-------------------------------|------------------|
| <i>Trim2</i>         | -1.616557997                  | 0.001053006      | <i>Gm5134</i>        | -2.125418632                  | 0.002656836      |
| <i>Cul9</i>          | -1.619370034                  | 7.54E-05         | <i>Stau2</i>         | -2.149372521                  | 0.006492957      |
| <i>Ankrd13d</i>      | -1.636165617                  | 0.001838493      | <i>Dctd</i>          | -2.153496299                  | 2.38E-05         |
| <i>Phlda3</i>        | -1.646101035                  | 0.00219099       | <i>Sema5b</i>        | -2.155932759                  | 0.008606469      |
| <i>Rasl11b</i>       | -1.651355467                  | 0.001368078      | <i>Klhl13</i>        | -2.157845084                  | 0.005547559      |
| <i>Eno2</i>          | -1.658863183                  | 0.000352835      | <i>Car6</i>          | -2.16304197                   | 0.008238871      |
| <i>Gtf2ird1</i>      | -1.65931663                   | 4.11E-07         | <i>Tnxb</i>          | -2.167863078                  | 0.007933612      |
| <i>Man1c1</i>        | -1.669647101                  | 0.006129299      | <i>Lhfpl1</i>        | -2.175027677                  | 0.004323686      |
| <i>Tfpi</i>          | -1.675191724                  | 6.81E-06         | <i>Tbc1d24</i>       | -2.19966545                   | 0.004957513      |
| <i>Fam69b</i>        | -1.677423558                  | 0.000376046      | <i>Msrp2</i>         | -2.202615877                  | 1.66E-11         |
| <i>Gm14085</i>       | -1.682320302                  | 0.000772184      | <i>Magi1</i>         | -2.218479485                  | 9.17E-06         |
| <i>Nap1l3</i>        | -1.695063004                  | 0.005841561      | <i>Lhfpl2</i>        | -2.225813928                  | 0.006398797      |
| <i>Tctex1d2</i>      | -1.695473232                  | 0.001040002      | <i>Zfp947</i>        | -2.228526809                  | 0.001300151      |
| <i>Gga2</i>          | -1.707784224                  | 0.000157496      | <i>Procr</i>         | -2.236432734                  | 0.005636025      |
| <i>Cfp</i>           | -1.714870515                  | 0.009143508      | <i>4921507P07Rik</i> | -2.239212824                  | 0.001772505      |
| <i>Hpgds</i>         | -1.717314029                  | 0.000184871      | <i>Flt4</i>          | -2.250065315                  | 0.003425783      |
| <i>Slc7a10</i>       | -1.719650044                  | 0.000618918      | <i>Tpst1</i>         | -2.266869666                  | 2.72E-05         |
| <i>Dab2ip</i>        | -1.742441474                  | 0.001042275      | <i>9530059O14Rik</i> | -2.267321814                  | 0.004890418      |
| <i>Plxna1</i>        | -1.750195458                  | 0.000925722      | <i>Fam149a</i>       | -2.270602296                  | 0.00490624       |
| <i>Capn3</i>         | -1.756321546                  | 7.02E-05         | <i>Kif21a</i>        | -2.277002999                  | 0.003802187      |
| <i>Adam12</i>        | -1.759520847                  | 0.005663936      | <i>Gylt11b</i>       | -2.288285558                  | 0.003568323      |
| <i>Azi1</i>          | -1.760651572                  | 8.77E-05         | <i>Sh3tc1</i>        | -2.292027706                  | 6.25E-05         |
| <i>Sorbs3</i>        | -1.771797834                  | 0.007061593      | <i>Slmo1</i>         | -2.297802715                  | 0.004128109      |
| <i>Ube2c</i>         | -1.783279211                  | 0.00302029       | <i>Bicd1</i>         | -2.307696846                  | 3.49E-20         |
| <i>Rhod</i>          | -1.786634035                  | 2.80E-06         | <i>Tph2</i>          | -2.308876951                  | 0.004334488      |
| <i>Ttc16</i>         | -1.789396645                  | 0.003149327      | <i>Psrc1</i>         | -2.312963135                  | 6.76E-05         |
| <i>Sgsm2</i>         | -1.810265098                  | 5.95E-05         | <i>Slpi</i>          | -2.324083689                  | 0.003568323      |
| <i>Clic3</i>         | -1.816438786                  | 0.009657127      | <i>D630045J12Rik</i> | -2.33708223                   | 0.002939655      |
| <i>Sec16b</i>        | -1.822416125                  | 0.000864339      | <i>Slc35d3</i>       | -2.376340449                  | 0.001891695      |
| <i>Gabrr2</i>        | -1.824576074                  | 0.000398807      | <i>Kndc1</i>         | -2.379933068                  | 0.001144623      |
| <i>Aldh2</i>         | -1.849117783                  | 8.54E-05         | <i>Myo7a</i>         | -2.381248071                  | 9.07E-06         |
| <i>Tet1</i>          | -1.871961731                  | 9.57E-08         | <i>Txnrd3</i>        | -2.389391091                  | 0.000102358      |
| <i>B230216N24Rik</i> | -1.873381334                  | 0.002489468      | <i>Plekha4</i>       | -2.424496994                  | 0.001724651      |
| <i>Nme4</i>          | -1.879373077                  | 0.008238871      | <i>Igf2bp1</i>       | -2.436390458                  | 0.001922516      |
| <i>Mctp1</i>         | -1.884777842                  | 9.64E-07         | <i>Entpd2</i>        | -2.441019403                  | 0.002112437      |
| <i>Ston1</i>         | -1.88718766                   | 0.0006993        | <i>Aldh3b1</i>       | -2.461497906                  | 0.001628802      |
| <i>B3galt5</i>       | -1.889273207                  | 0.00088104       | <i>Zfhx3</i>         | -2.48104622                   | 0.001163186      |
| <i>Rapgef4</i>       | -1.899663593                  | 0.000141919      | <i>Mmp11</i>         | -2.495047381                  | 1.02E-05         |
| <i>Gucy1b3</i>       | -1.906505161                  | 0.001447867      | <i>Bfsp2</i>         | -2.498560224                  | 0.000691909      |
| <i>Ephx1</i>         | -1.916783765                  | 4.67E-43         | <i>Cdcp1</i>         | -2.510828416                  | 2.36E-05         |
| <i>Kifc3</i>         | -1.93782179                   | 0.007028312      | <i>Rassf4</i>        | -2.518626301                  | 0.000824271      |
| <i>6720401G13Rik</i> | -1.957367198                  | 2.65E-06         | <i>Tmem144</i>       | -2.536243046                  | 0.00047794       |
| <i>Ankrd6</i>        | -1.993802609                  | 1.98E-05         | <i>Pls1</i>          | -2.547385146                  | 0.000757595      |
| <i>Mcc</i>           | -2.001992203                  | 0.00951619       | <i>Phactr1</i>       | -2.606909076                  | 0.000896616      |
| <i>Bend6</i>         | -2.002947714                  | 0.000100668      | <i>Wbscr27</i>       | -2.63251965                   | 2.48E-08         |
| <i>Extl1</i>         | -2.021282719                  | 8.84E-05         | <i>Alas2</i>         | -2.659077977                  | 3.27E-06         |
| <i>Rragd</i>         | -2.028301528                  | 3.82E-11         | <i>Lcn13</i>         | -2.687851266                  | 0.000413576      |
| <i>Tmcc3</i>         | -2.037881069                  | 0.000570731      | <i>Ptpn14</i>        | -2.72916564                   | 0.00020935       |
| <i>Nckap5l</i>       | -2.040244556                  | 0.000209139      | <i>Adamts14</i>      | -2.73440504                   | 4.12E-06         |
| <i>Enpp2</i>         | -2.059185153                  | 0.005914905      | <i>Crtam</i>         | -2.734757366                  | 7.99E-05         |
| <i>Maoa</i>          | -2.067895621                  | 0.00476702       | <i>1810006J02Rik</i> | -2.765147644                  | 2.55E-11         |
| <i>Tiam2</i>         | -2.08048923                   | 0.001266127      | <i>A530050N04Rik</i> | -2.766781473                  | 0.000341778      |
| <i>Fras1</i>         | -2.083339494                  | 0.009102222      | <i>Muc4</i>          | -2.782517055                  | 6.98E-06         |
| <i>Pilra</i>         | -2.084839799                  | 0.008160749      | <i>Ncf1</i>          | -2.790503745                  | 2.41E-09         |
| <i>Cav2</i>          | -2.097957721                  | 0.007209038      | <i>Nos2</i>          | -2.796626074                  | 0.000143762      |
| <i>nr2</i>           | -2.102304013                  | 0.000130369      | <i>Siglec1</i>       | -2.890510475                  | 0.000114157      |
| <i>Sifn4</i>         | -2.107904161                  | 0.006390156      | <i>Cd14</i>          | -2.910917127                  | 0.000118145      |
| <i>1700123M08Rik</i> | -2.110891405                  | 0.003217499      | <i>Gsdmc</i>         | -3.005662839                  | 5.43E-05         |
| <i>BC051142</i>      | -2.119664502                  | 0.00931739       | <i>F13a1</i>         | -3.032965187                  | 2.53E-06         |
| <i>Tmem146</i>       | -2.123484509                  | 0.001632094      | <i>Ltbp4</i>         | -3.375969027                  | 6.47E-08         |

FoxP3-Cre (WT) and Helios<sup>fl/fl</sup>.FoxP3-Cre (KO) mice were inoculated s.c. with B16/F10 before small numbers (~400) of splenic and tumor Tregs (YFP<sup>+</sup>) were sorted for gene expression profiling. Genes that display differential expression between intrasplenic (spleen) and intratumoral (tumor) Tregs from FoxP3-Cre (WT) and Helios<sup>fl/fl</sup>.FoxP3-Cre (KO) mice are presented according to a Log<sub>2</sub>-fold change  $\geq 1.5$ , and P value  $< 0.01$ .
